# Supplementary material for: Photolytic Degradation of the Insecticide Clothianidin in Hydrochar Aquatic Suspensions and Extracts
Source: MDPI journal article supplement (doi:10.3390/photochem3040027), 2023-11-07
Supplement: s1 [file s1]

Supplementary Information

# Photolytic degradation of the insecticide clothianidin in hydrochar aquatic suspensions and extracts

Artemis Pappa <sup>1</sup>, Feidias Bairamis <sup>1</sup> and Ioannis Konstantinou <sup>1,2,\*</sup>

<sup>1</sup> Department of Chemistry, University of Ioannina, 45110 Ioannina, Greece;  
pappaartemisd@gmail.com (A.P.); bairamisfeidias@gmail.com (F.B)

<sup>2</sup> Institute of Environment and Sustainable Development, University Research and Innovation  
Center of Ioannina, 45110 Ioannina, Greece

\* Correspondence: iokonst@uoi.gr

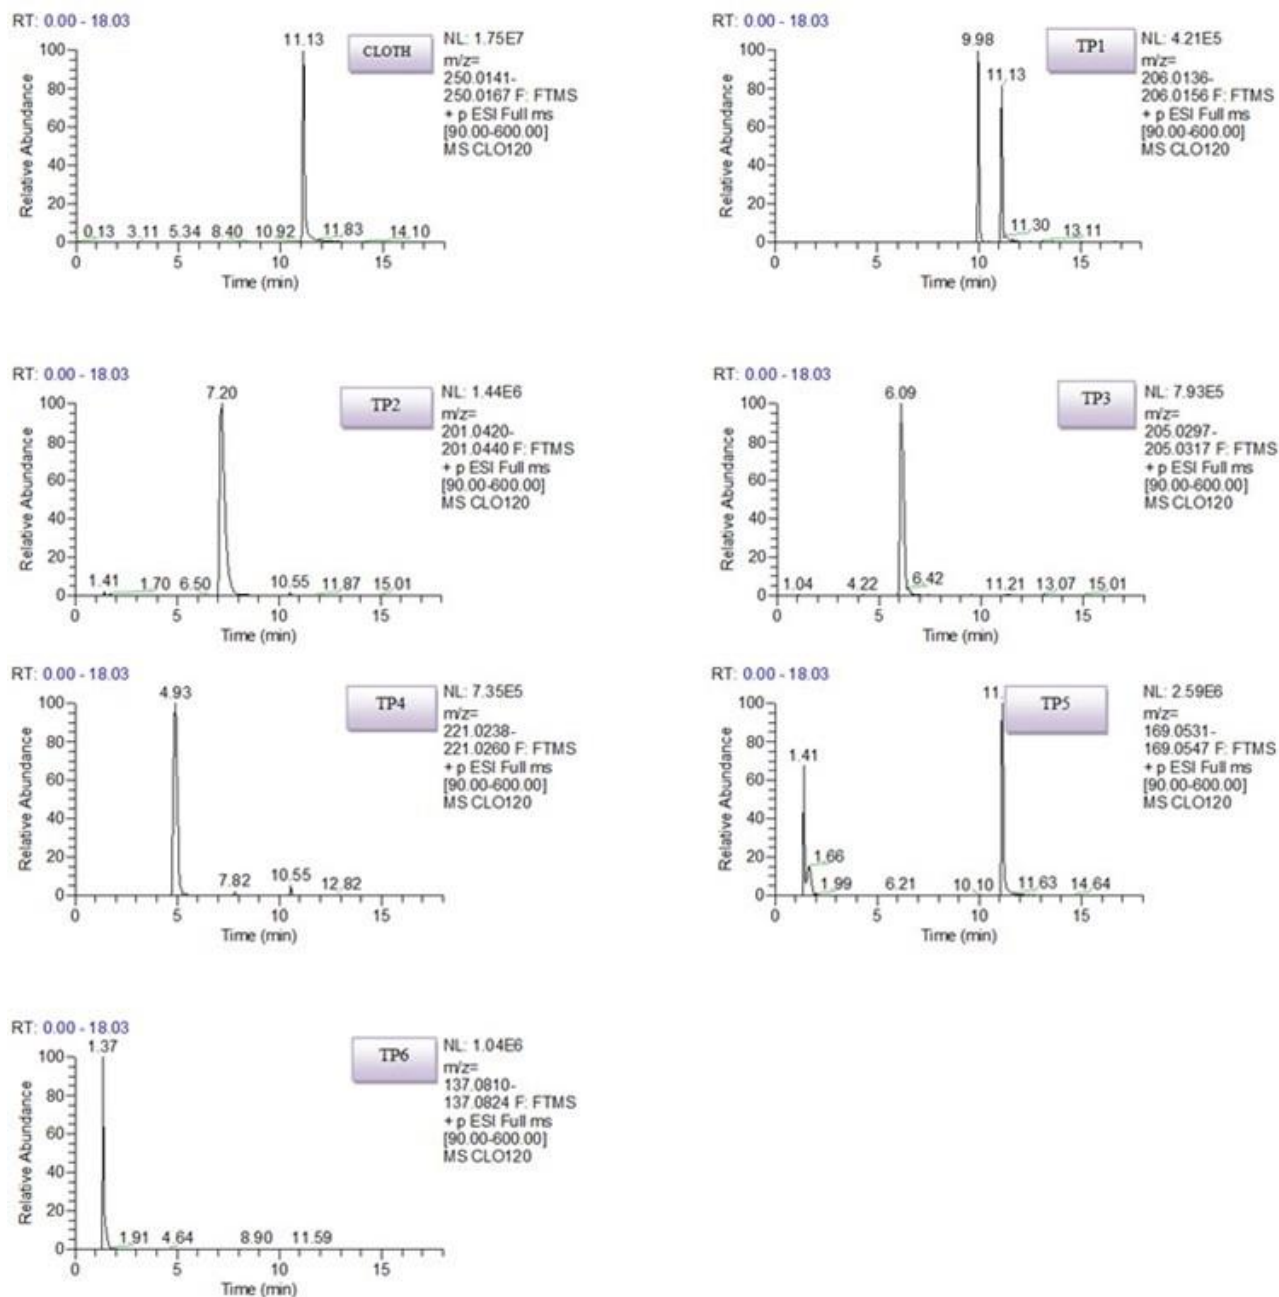

**Figure S1.** Chromatograms of selected ions of clothianidin and its transformation products (TPs) formed after 120 min of simulated solar irradiation in the presence of hydrochar particles.

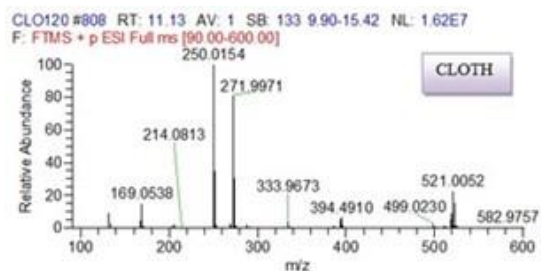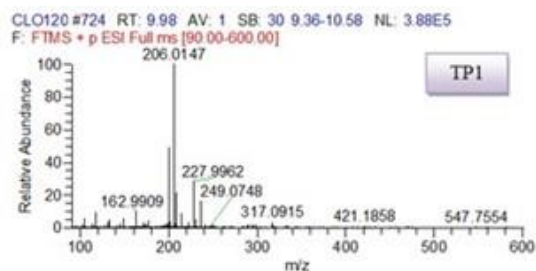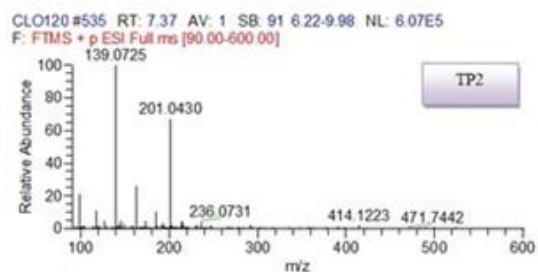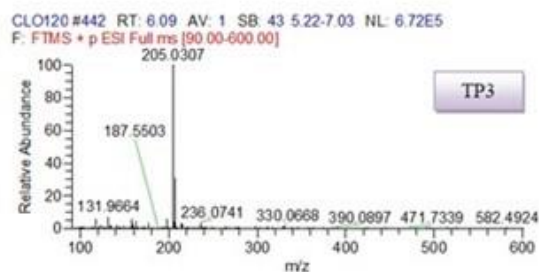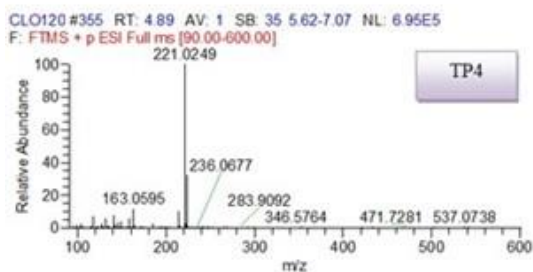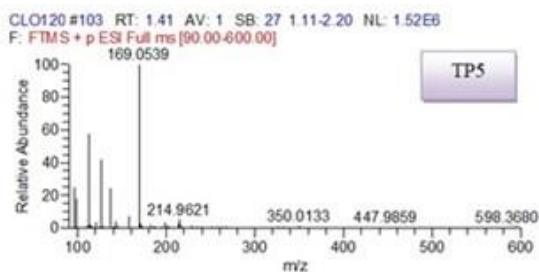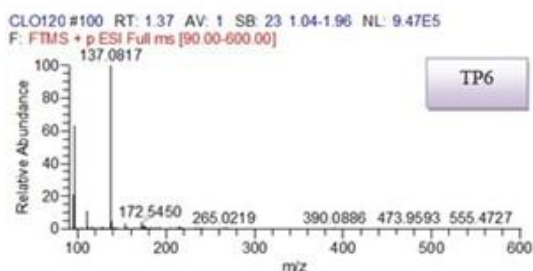

Figure S2. Mass spectra of clothianidin and its transformation products (TPs).
